# Supplementary material for: Serum cytokines and neutrophil-to-lymphocyte ratio as predictive biomarkers of benefit from PD-1 inhibitors in gastric cancer
Source: PubMed Central journal article supplement (PMC10643875; doi:10.3389/fimmu.2023.1274431), 2023-10-31
Supplement: DataSheet_1.pdf [file DataSheet_1.pdf]

## *Supplementary Material*

### Supplementary Tables:

**Table S1: The median of baseline blood parameters.**

| <b>median</b>   | <b>IL-2</b> | <b>IL-4</b> | <b>IL-6</b> | <b>IL-10</b> | <b>TNF-<math>\alpha</math></b> | <b>IFN-<math>\gamma</math></b> | <b>IL-17A</b> | <b>TLC</b> | <b>NLR</b> | <b>PLR</b> | <b>LMR</b> |
|-----------------|-------------|-------------|-------------|--------------|--------------------------------|--------------------------------|---------------|------------|------------|------------|------------|
| <b>Cohort 1</b> | 1.96        | 2.37        | 12.06       | 2.86         | 1.87                           | 2.11                           | 8.20          | 1.31       | 2.60       | 149.23     | 3.46       |
| <b>Cohort 2</b> | 1.49        | 1.93        | 4.85        | 2.65         | 2.23                           | 1.94                           | 5.72          | 1.37       | 2.34       | 149.69     | 3.71       |

**Table S2: The median of blood parameters after 2 cycles of treatment.**

| <b>median</b>   | <b>IL-2</b> | <b>IL-4</b> | <b>IL-6</b> | <b>IL-10</b> | <b>TNF-<math>\alpha</math></b> | <b>IFN-<math>\gamma</math></b> | <b>IL-17A</b> | <b>TLC</b> | <b>NLR</b> | <b>PLR</b> | <b>LMR</b> |
|-----------------|-------------|-------------|-------------|--------------|--------------------------------|--------------------------------|---------------|------------|------------|------------|------------|
| <b>Cohort 1</b> | 2.65        | 3.71        | 7.31        | 2.88         | 2.82                           | 2.01                           | 6.21          | 1.35       | 3.01       | 114.57     | 3.14       |
| <b>Cohort 2</b> | 2.32        | 2.49        | 7.27        | 3.03         | 2.45                           | 2.61                           | 4.61          | 1.36       | 1.89       | 134.81     | 2.66       |

**Table S3: The cut-off value of baseline blood parameters calculated by the web-based software X-tile.**

|                 | cut-off value | IL-2 | IL-4 | IL-6  | IL-10 | TNF- $\alpha$ | IFN- $\gamma$ | IL-17A | TLC  | NLR  | PLR    | LMR  |
|-----------------|---------------|------|------|-------|-------|---------------|---------------|--------|------|------|--------|------|
| <b>Cohort 1</b> | <b>OS</b>     | 1.83 | 2.79 | 14.34 | 2.18  | 1.27          | 2.11          | 7.43   | 0.90 | 1.41 | 189.23 | 2.00 |
|                 | <b>PFS</b>    | 1.42 | 2.91 | 17.39 | 2.18  | 1.15          | 1.50          | 5.68   | 1.20 | 2.31 | 111.83 | 3.12 |
| <b>Cohort 2</b> | <b>OS</b>     | 1.51 | 0.91 | 3.60  | 4.54  | 3.40          | 1.41          | 5.30   | 2.03 | 2.92 | 282.76 | 2.91 |
|                 | <b>PFS</b>    | 2.03 | 1.91 | 9.58  | 2.42  | 2.20          | 2.62          | 5.30   | 0.93 | 2.92 | 189.10 | 3.45 |

**Table S4: The cut-off value of blood parameters after 2 cycles of treatment calculated by the web-based software X-tile.**

|                 | cut-off value | IL-2 | IL-4 | IL-6  | IL-10 | TNF- $\alpha$ | IFN- $\gamma$ | IL-17A | TLC  | NLR  | PLR    | LMR  |
|-----------------|---------------|------|------|-------|-------|---------------|---------------|--------|------|------|--------|------|
| <b>Cohort 1</b> | <b>OS</b>     | 2.71 | 2.21 | 15.35 | 3.21  | 2.71          | 3.78          | 15.31  | 1.63 | 2.81 | 114.57 | 4.63 |
|                 | <b>PFS</b>    | 3.20 | 3.71 | 20.23 | 3.32  | 2.71          | 1.10          | 3.33   | 1.60 | 2.81 | 207.41 | 1.42 |
| <b>Cohort 2</b> | <b>OS</b>     | 2.54 | 1.62 | 12.66 | 2.12  | 2.53          | 2.22          | 6.40   | 1.42 | 1.30 | 88.29  | 2.39 |
|                 | <b>PFS</b>    | 1.40 | 3.81 | 8.38  | 3.72  | 1.28          | 2.22          | 6.40   | 1.82 | 1.89 | 153.00 | 2.97 |

**Table S5: Characteristics of healthy controls and the GC groups.**

| Clinical characteristics |        | healthy control<br>n=33 | GC patients<br>n=77 | P value |
|--------------------------|--------|-------------------------|---------------------|---------|
| gender                   | male   | 20(60.6)                | 53(68.8)            | 0.403   |
|                          | female | 13(39.4)                | 24(31.2)            |         |
| age                      | <60    | 16(48.5)                | 40(51.9)            | 0.739   |
|                          | ≥60    | 17(51.5)                | 37(48.1)            |         |

**Table S6: Comparison of baseline blood parameters between GC patients and healthy individuals.**

|                                        | Healthy individual |             | GC patients   |             | P value           |
|----------------------------------------|--------------------|-------------|---------------|-------------|-------------------|
|                                        | median             | Q1-Q3       | median        | Q1-Q3       |                   |
| <b>IL-2 (pg/mL)</b>                    | 1.82               | 1.28-2.40   | 1.74          | 1.20-2.60   | 0.924             |
| <b>IL-4 (pg/mL)</b>                    | 2.17               | 1.80-2.72   | 1.99          | 0.88-3.31   | 0.655             |
| <b>IL-6 (pg/mL)</b>                    | <b>3.86</b>        | 2.15-4.48   | <b>6.10</b>   | 3.96-14.27  | <b>&lt;0.0001</b> |
| <b>IL-10 (pg/mL)</b>                   | <b>1.86</b>        | 1.13-2.46   | <b>2.69</b>   | 1.84-3.82   | <b>&lt;0.0001</b> |
| <b>TNF-<math>\alpha</math> (pg/mL)</b> | <b>1.41</b>        | 0.41-2.54   | <b>1.94</b>   | 1.30-2.74   | <b>0.021</b>      |
| <b>IFN-<math>\gamma</math> (pg/mL)</b> | 1.90               | 1.46-2.72   | 2.06          | 1.46-2.61   | 0.774             |
| <b>IL-17A (pg/mL)</b>                  | 4.71               | 1.02-6.82   | 8.20          | 2.78-9.44   | 0.075             |
| <b>TLC (<math>10^9</math>)</b>         | <b>1.97</b>        | 1.61-2.24   | <b>1.32</b>   | 1.02-1.74   | <b>&lt;0.0001</b> |
| <b>NLR</b>                             | <b>1.75</b>        | 1.31-2.46   | <b>2.34</b>   | 1.53-3.61   | <b>0.0085</b>     |
| <b>PLR</b>                             | <b>121.10</b>      | 99.28-136.9 | <b>149.20</b> | 109.7-216.3 | <b>0.0034</b>     |
| <b>LMR</b>                             | <b>5.00</b>        | 3.95-6.27   | <b>3.48</b>   | 2.34-4.25   | <b>&lt;0.0001</b> |

**Table S7: Correlation between baseline blood indexes and clinical features in GC patients, median (Q1, Q3).**

| characteristics |           | IL-2             | IL-4            | IL-6                     | IL-10           | TNF- $\alpha$   | IFN- $\gamma$          | IL-17A           | TL<br>C               | NLR                    | PLR                          | LMR                    |
|-----------------|-----------|------------------|-----------------|--------------------------|-----------------|-----------------|------------------------|------------------|-----------------------|------------------------|------------------------------|------------------------|
| gender          | male      | 1.64 (1.11-2.48) | 1.91(0.83-3.11) | <b>5.81(3.51-12.36)</b>  | 2.69(1.88-3.78) | 2(1.39-2.85)    | 2.04(1.42-2.65)        | 5.31(2.46-8.98)  | 1.31(1.02-1.7)        | <b>2.5(1.76-4.48)</b>  | <b>157.27(110.88-260.72)</b> | 3.38(2.1-4.12)         |
|                 | female    | 1.79(1.48-3.05)  | 2.78(1.25-4.08) | <b>12.09(4.95-22.45)</b> | 2.59(1.78-5.22) | 1.6(0.99-2.48)  | 2.07(1.69-2.58)        | 6.02(3.82-9.87)  | 1.58(0.95-1.81)       | <b>1.45(1.07-2.62)</b> | <b>115.51(102.41-170)</b>    | 3.85(3.17-4.77)        |
| <b>P</b>        |           | <b>0.032</b>     |                 |                          |                 |                 |                        |                  |                       |                        |                              |                        |
| smoke           | no        | 1.79(1.18-2.58)  | 2.3(0.99-3.22)  | 6.19(3.54-14.57)         | 2.79(1.97-3.85) | 1.95(1.26-2.91) | 2.07(1.68-2.57)        | 5.66(3.77-9.66)  | 1.31(1.1-1.66)        | 2.56(1.55-4.12)        | 149.58(113.35-248.01)        | 3.36(2.22-4.15)        |
|                 | yes       | 1.71(1.21-2.6)   | 1.75(0.8-3.33)  | 6.08(4.58-14.19)         | 2.49(1.8-3.78)  | 1.94(1.3-2.63)  | 1.74(1.18-2.77)        | 6.86(2.01-9.04)  | 1.4(1.04-2.08)        | 2.07(1.44-3.35)        | 140.91(103.76-189.1)         | 3.87(2.39-4.46)        |
| <b>P</b>        |           | <b>0.003</b>     |                 |                          |                 |                 |                        |                  |                       |                        |                              |                        |
| family          | no        | 1.83(1.11-2.76)  | 1.93(0.82-3.21) | <b>8.7(4.58-15.66)</b>   | 2.82(1.81-3.87) | 2.04(1.3-2.91)  | 2.07(1.41-2.62)        | 5.68(2.34-9.62)  | 1.31(0.93-1.7)        | 2.39(1.6-4.01)         | 151.33(109.92-226.92)        | 3.46(2.3-4.05)         |
|                 | yes       | 1.51(1.37-2.08)  | 2.17(0.99-4.3)  | <b>4.06(2.98-6.68)</b>   | 2.47(1.95-3.47) | 1.6(0.99-2.56)  | 1.93(1.69-2.4)         | 5.68(3.06-10.36) | 1.49(1.21-1.87)       | 1.9(1.44-3.03)         | 124.51(100.79-167.36)        | 4.17(2.58-5.55)        |
| <b>P</b>        |           | <b>0.012</b>     |                 |                          |                 |                 |                        |                  |                       |                        |                              |                        |
| disease         | no        | 1.74(1.29-2.48)  | 1.93(0.88-3.06) | 6.1(3.98-15.46)          | 2.65(1.91-3.82) | 1.97(1.45-2.66) | 2.06(1.52-2.55)        | 5.31(3.05-7.89)  | 1.4(1.1-1.79)         | 2.31(1.59-3.2)         | 148.53(110.88-193.36)        | <b>3.78(2.72-4.4)</b>  |
|                 | yes       | 1.79(1.02-2.84)  | 2.7(0.87-4.81)  | 6.25(3.51-12.49)         | 2.96(1.73-4.25) | 1.78(1.03-3.07) | 2(1.37-3.5)            | 9.09(2.09-18.68) | 1.28(0.8-1.7)         | 2.78(1.37-5.59)        | 176.73(100.76-321.6)         | <b>2.62(2.09-3.84)</b> |
| <b>P</b>        |           | <b>0.028</b>     |                 |                          |                 |                 |                        |                  |                       |                        |                              |                        |
| stage           | I-II      | 1.42(1.08-3.2)   | 1.73(0.8-2.61)  | 5.53(2.57-16.97)         | 2.8(2.05-3.79)  | 2.09(1.09-2.97) | 1.93(1.49-2.43)        | 4.51(2.17-7.97)  | 1.35(0.87-1.65)       | 2.89(1.89-4.12)        | 130.27(102.43-257.74)        | 3.25(1.97-4.27)        |
|                 | III-IV    | 1.86(1.36-2.59)  | 2.32(0.91-3.31) | 6.42(4.42-14.19)         | 2.65(1.8-3.87)  | 1.92(1.42-2.69) | 2.08(1.43-2.62)        | 5.82(3.19-9.79)  | 1.31(1.04-1.79)       | 2.15(1.44-3.44)        | 157.27(112.92-209.38)        | 3.71(2.37-4.26)        |
| <b>P</b>        |           | <b>0.001</b>     |                 |                          |                 |                 |                        |                  |                       |                        |                              |                        |
| ecog            | $\leq 2$  | 1.71(1.18-2.67)  | 1.93(0.91-3.21) | 6.42(3.99-14.34)         | 2.69(1.92-3.79) | 1.97(1.3-2.69)  | 2.07(1.5-2.59)         | 5.64(2.65-8.87)  | <b>1.4(1.1-1.82)</b>  | 2.31(1.46-3.35)        | 140.72(103.05-205.83)        | 3.48(2.3-4.24)         |
|                 | $> 2$     | 1.79(1.24-2.25)  | 2.46(0.79-3.9)  | 6.05(3.51-13.63)         | 2.47(1.66-4.07) | 1.56(1.26-2.83) | 1.98(1.36-2.94)        | 8.22(3.17-14.57) | <b>1.1(0.81-1.38)</b> | 2.76(2.12-4.5)         | 176.73(135.2-291.42)         | 3.64(2.32-5.38)        |
| <b>P</b>        |           | <b>0.048</b>     |                 |                          |                 |                 |                        |                  |                       |                        |                              |                        |
| surgery         | no        | 50(25-75)        | 1.49(1.1-2.36)  | 1.75(0.8-3.34)           | 6.1(3.97-13.7)  | 2.58(1.87-3.54) | <b>1.89(1.1-2.55)</b>  | 1.84(1.41-2.25)  | 36.4(34-40)           | <b>1.4(1.2-1.7)</b>    | 2.07(1.41-2.86)              | 149.47(111.83-209.38)  |
|                 | yes       | 2.16(1.51-2.8)   | 2.59(1.31-3.31) | 7.39(3.86-14.67)         | 2.87(1.79-4.13) | 2.28(1.59-2.96) | <b>2.41(1.88-3.06)</b> | 6.99(3.69-10.63) | 1.21(0.9-1.87)        | <b>2.72(2.04-5.01)</b> | 148.88(108.07-257.66)        | 3.34(2.04-3.88)        |
| <b>P</b>        |           | <b>0.009</b>     |                 |                          |                 |                 |                        |                  |                       |                        |                              |                        |
| age             | $> 60$    | 1.71(1.19-2.26)  | 1.93(0.81-3)    | <b>8.72(4.59-16.99)</b>  | 2.86(2.04-3.87) | 1.72(1.25-2.74) | 2.06(1.48-2.52)        | 5.3(2.2-5-9.15)  | 1.24(0.92-1.81)       | 2.55(1.69-4.48)        | 149.23(109.72-246.07)        | 3.38(2.15-3.88)        |
|                 | $\leq 60$ | 1.92(1.22-2.75)  | 2.35(0.94-3.45) | <b>5.25(3.18-12.05)</b>  | 2.5(1.75-3.66)  | 2.15(1.4-2.86)  | 2.08(1.44-2.98)        | 6(2.97-10.27)    | 1.56(1.15-1.7)        | 2.17(1.47-3.07)        | 146.12(105.78-216.78)        | 3.89(2.41-5.08)        |
| <b>P</b>        |           | <b>0.048</b>     |                 |                          |                 |                 |                        |                  |                       |                        |                              |                        |

**Table S8: Univariate and Multivariate analysis for PFS and OS of Cohort 1 (blood parameters after 2 cycles of treatment) grouped by median.**

| Characteristics       | OS                          |              |                            |              | PFS                       |              |                            |              |
|-----------------------|-----------------------------|--------------|----------------------------|--------------|---------------------------|--------------|----------------------------|--------------|
|                       | univariate analysis         |              | multivariate analysis      |              | univariate analysis       |              | multivariate analysis      |              |
|                       | HR(95% CI)                  | P            | HR(95% CI)                 | P            | HR(95% CI)                | P            | HR(95% CI)                 | P            |
| IL-2                  | <b>0.404(0.198-0.826)</b>   | <b>0.013</b> | <b>0.464(0.221-0.971)</b>  | <b>0.042</b> | 0.639(0.333-1.225)        | 0.177        | -                          | -            |
| IL-4                  | 0.629(0.335-1.182)          | 0.150        | -                          | -            | 0.769(0.412-1.435)        | 0.409        | -                          | -            |
| IL-6                  | <b>2.677(1.349-5.309)</b>   | <b>0.005</b> | <b>2.136(1.004-4.544)</b>  | <b>0.049</b> | <b>1.907(0.993-3.662)</b> | <b>0.053</b> | <b>4.426(1.857-10.549)</b> | <b>0.001</b> |
| IL-10                 | 0.854(0.452-1.613)          | 0.627        | -                          | -            | 0.661(0.337-1.295)        | 0.227        | -                          | -            |
| TNF- $\alpha$         | 0.737(0.392-1.384)          | 0.342        | -                          | -            | 0.644(0.339-1.224)        | 0.179        | -                          | -            |
| IFN- $\gamma$         | 1.145(0.614-2.135)          | 0.671        | -                          | -            | 1.061(0.568-1.981)        | 0.853        | -                          | -            |
| IL-17A                | 1.663(0.88-3.146)           | 0.118        | -                          | -            | <b>2.171(1.144-4.121)</b> | <b>0.018</b> | <b>4.745(2.008-11.217)</b> | <b>0.000</b> |
| TLC                   | 0.856(0.458-1.599)          | 0.625        | -                          | -            | 0.828(0.444-1.545)        | 0.554        | -                          | -            |
| NLR                   | <b>2.25(1.165-4.344)</b>    | <b>0.016</b> | 1.656(0.791-3.467)         | 0.181        | <b>2.207(1.166-4.177)</b> | <b>0.015</b> | 1.423(0.743-2.726)         | 0.288        |
| PLR                   | 1.065(0.571-1.987)          | 0.843        | -                          | -            | 1.553(0.826-2.922)        | 0.172        | -                          | -            |
| LMR                   | 0.884(0.473-1.651)          | 0.698        | -                          | -            | 0.696(0.371-1.307)        | 0.260        | -                          | -            |
| gender                | 0.921(0.479-1.768)          | 0.804        | -                          | -            | 0.875(0.459-1.667)        | 0.685        | -                          | -            |
| age (year)            | 0.74(0.39-1.403)            | 0.357        | -                          | -            | 0.968(0.504-1.86)         | 0.922        | -                          | -            |
| ECOG (>2)             | <b>10.172(3.453-29.966)</b> | <b>0.000</b> | <b>10.019(3.072-32.68)</b> | <b>0.000</b> | 1.659(0.723-3.81)         | 0.233        | -                          | -            |
| TNM stage (III-IV)    | 1.267(0.526-3.055)          | 0.598        | -                          | -            | 0.953(0.391-2.322)        | 0.915        | -                          | -            |
| surgery history       | 1.33(0.699-2.529)           | 0.385        | -                          | -            | 0.957(0.512-1.79)         | 0.891        | -                          | -            |
| other chronic disease | 1.001(0.484-2.069)          | 0.999        | -                          | -            | 1.072(0.521-2.208)        | 0.850        | -                          | -            |
| smoked                | 0.903(0.47-1.734)           | 0.758        | -                          | -            | 0.97(0.508-1.852)         | 0.927        | -                          | -            |
| family cancer history | 1.373(0.563-3.349)          | 0.486        | -                          | -            | 0.765(0.319-1.833)        | 0.548        | -                          | -            |

Cohort 1 blood parameters after 2 cycles of treatment were grouped by the median.

**Table S9: Univariate and Multivariate analysis for PFS and OS of Cohort 1 (blood parameters after 2 cycles of treatment) grouped by cut-off value.**

| Characteristics       | OS                          |              |                           |              | PFS                       |              |                            |              |
|-----------------------|-----------------------------|--------------|---------------------------|--------------|---------------------------|--------------|----------------------------|--------------|
|                       | univariate analysis         |              | multivariate analysis     |              | univariate analysis       |              | multivariate analysis      |              |
|                       | HR(95% CI)                  | P            | HR(95% CI)                | P            | HR(95% CI)                | P            | HR(95% CI)                 | P            |
| IL-2                  | <b>0.334(0.158-0.703)</b>   | <b>0.004</b> | <b>0.3(0.136-0.663)</b>   | <b>0.003</b> | <b>0.394(0.183-0.852)</b> | <b>0.018</b> | <b>0.243(0.102-0.577)</b>  | <b>0.001</b> |
| IL-4                  | 0.433(0.147-1.279)          | 0.130        | -                         | -            | 0.769(0.412-1.435)        | 0.409        | -                          | -            |
| IL-6                  | <b>4.062(1.804-9.145)</b>   | <b>0.001</b> | <b>9.01(2.733-29.702)</b> | <b>0.000</b> | <b>6.54(2.317-18.464)</b> | <b>0.000</b> | <b>5.731(1.795-18.295)</b> | <b>0.003</b> |
| IL-10                 | 0.805(0.413-1.568)          | 0.524        | -                         | -            | 1.19(0.618-2.29)          | 0.603        | -                          | -            |
| TNF- $\alpha$         | 0.699(0.373-1.312)          | 0.266        | -                         | -            | 0.6(0.315-1.139)          | 0.118        | -                          | -            |
| IFN- $\gamma$         | 1.906(0.822-4.421)          | 0.133        | -                         | -            | 2.085(0.788-5.515)        | 0.139        | -                          | -            |
| IL-17A                | <b>3.617(1.419-9.223)</b>   | <b>0.007</b> | <b>5.756(2.017-16.42)</b> | <b>0.001</b> | 0.635(0.309-1.308)        | 0.218        | -                          | -            |
| TLC                   | 2.177(1.126-4.209)          | 0.021        | 2.667(0.837-8.502)        | 0.097        | <b>2.305(1.185-4.483)</b> | <b>0.014</b> | 1.214(0.471-3.131)         | 0.689        |
| NLR                   | <b>0.424(0.22-0.816)</b>    | <b>0.010</b> | 1.796(0.498-6.482)        | 0.371        | <b>0.373(0.19-0.733)</b>  | <b>0.004</b> | 0.663(0.248-1.769)         | 0.411        |
| PLR                   | 0.683(0.366-1.275)          | 0.231        | -                         | -            | 0.557(0.232-1.339)        | 0.191        | -                          | -            |
| LMR                   | 1.493(0.752-2.965)          | 0.252        | -                         | -            | <b>2.801(0.964-8.143)</b> | <b>0.059</b> | 1.371(0.44-4.267)          | 0.586        |
| gender                | 0.921(0.479-1.768)          | 0.804        | -                         | -            | 0.875(0.459-1.667)        | 0.685        | -                          | -            |
| age (year)            | 0.74(0.39-1.403)            | 0.357        | -                         | -            | 0.968(0.504-1.86)         | 0.922        | -                          | -            |
| ECOG (>2)             | <b>10.172(3.453-29.966)</b> | <b>0.000</b> | 23.868(5.091-111.894)     | 0.000        | 1.659(0.723-3.81)         | 0.233        | -                          | -            |
| TNM stage (III-IV)    | 1.267(0.526-3.055)          | 0.598        | -                         | -            | 0.953(0.391-2.322)        | 0.915        | -                          | -            |
| surgery history       | 1.33(0.699-2.529)           | 0.385        | -                         | -            | 0.957(0.512-1.79)         | 0.891        | -                          | -            |
| other chronic disease | 1.001(0.484-2.069)          | 0.999        | -                         | -            | 1.072(0.521-2.208)        | 0.850        | -                          | -            |
| smoked                | 0.903(0.47-1.734)           | 0.758        | -                         | -            | 0.97(0.508-1.852)         | 0.927        | -                          | -            |
| family cancer history | 1.373(0.563-3.349)          | 0.486        | -                         | -            | 0.765(0.319-1.833)        | 0.548        | -                          | -            |

Cohort 1 blood parameters after 2 cycles of treatment were grouped by cut-off value.

**Table S10: Univariate and multivariate analysis for PFS and OS of Cohort 2 (blood parameters after 2 cycles of treatment) grouped by median.**

| Clinical characteristics    | OS                       |              |                           |              | PFS                 |       |                       |   |
|-----------------------------|--------------------------|--------------|---------------------------|--------------|---------------------|-------|-----------------------|---|
|                             | univariate analysis      |              | multivariate analysis     |              | univariate analysis |       | multivariate analysis |   |
|                             | HR (95% CI)              | P            | HR (95% CI)               | P            | HR (95% CI)         | P     | HR (95% CI)           | P |
| IL-2                        | 0.818(0.408-1.641)       | 0.572        | -                         | -            | 0.969(0.497-1.892)  | 0.927 | -                     | - |
| IL-4                        | 0.741(0.376-1.46)        | 0.386        | -                         | -            | 0.751(0.369-1.528)  | 0.429 | -                     | - |
| IL-6                        | 1.109(0.568-2.164)       | 0.761        | -                         | -            | 0.817(0.418-1.598)  | 0.555 | -                     | - |
| IL-10                       | 0.715(0.364-1.404)       | 0.330        | -                         | -            | 0.602(0.301-1.207)  | 0.153 | -                     | - |
| TNF- $\alpha$               | 0.981(0.499-1.927)       | 0.955        | -                         | -            | 1.507(0.762-2.982)  | 0.239 | -                     | - |
| IFN- $\gamma$               | 1.32(0.678-2.572)        | 0.415        | -                         | -            | 0.893(0.454-1.755)  | 0.742 | -                     | - |
| IL-17A                      | 1.64(0.821-3.276)        | 0.161        | -                         | -            | 1.617(0.82-3.188)   | 0.166 | -                     | - |
| TLC                         | <b>1.874(0.946-3.71)</b> | <b>0.072</b> | 1.487(0.711-3.111)        | 0.292        | 1.259(0.64-2.478)   | 0.505 | -                     | - |
| NLR                         | 1.485(0.722-3.055)       | 0.282        | -                         | -            | 0.811(0.413-1.591)  | 0.542 | -                     | - |
| PLR                         | 0.605(0.306-1.196)       | 0.149        | -                         | -            | 0.984(0.504-1.922)  | 0.963 | -                     | - |
| LMR                         | 1.406(0.719-2.75)        | 0.319        | -                         | -            | 1.501(0.763-2.952)  | 0.239 | -                     | - |
| gender                      | 1.204(0.46-3.154)        | 0.705        | -                         | -            | 1.209(0.463-3.161)  | 0.698 | -                     | - |
| age                         | 0.731(0.372-1.439)       | 0.365        | -                         | -            | 1.074(0.549-2.101)  | 0.836 | -                     | - |
| ECOG, (>2)                  | 1.638(0.701-3.831)       | 0.255        | -                         | -            | 1.867(0.786-4.435)  | 0.157 | -                     | - |
| TNM stage, (III-IV)         | 1.047(0.528-2.077)       | 0.895        | -                         | -            | 0.86(0.436-1.694)   | 0.662 | -                     | - |
| surgery history             | <b>0.111(0.036-0.34)</b> | <b>0.000</b> | <b>0.148(0.042-0.517)</b> | <b>0.003</b> | 0.493(0.209-1.161)  | 0.106 | -                     | - |
| other chronic basic disease | 1.155(0.54-2.47)         | 0.711        | -                         | -            | 0.771(0.367-1.623)  | 0.494 | -                     | - |
| smoked                      | <b>1.992(0.96-4.134)</b> | <b>0.064</b> | 1.224(0.503-2.974)        | 0.656        | 1.614(0.787-3.307)  | 0.191 | -                     | - |
| family cancer history       | 0.767(0.332-1.77)        | 0.534        | -                         | -            | 0.761(0.323-1.791)  | 0.532 | -                     | - |

Cohort 2 blood parameters after 2 cycles of treatment were grouped by the median.

**Table S11: Univariate and multivariate analysis for PFS and OS of Cohort 2 (blood parameters after 2 cycles of treatment) grouped by cut-off value.**

| Clinical characteristics    | OS                        |              |                           |              | PFS                       |              |                       |   |
|-----------------------------|---------------------------|--------------|---------------------------|--------------|---------------------------|--------------|-----------------------|---|
|                             | univariate analysis       |              | multivariate analysis     |              | univariate analysis       |              | multivariate analysis |   |
|                             | HR (95% CI)               | P            | HR (95% CI)               | P            | HR (95% CI)               | P            | HR (95% CI)           | P |
| IL-2                        | 0.726(0.355-1.485)        | 0.380        | -                         | -            | 1.461(0.726-2.938)        | 0.288        | -                     | - |
| IL-4                        | 0.578(0.268-1.245)        | 0.161        | -                         | -            | 0.81(0.4-1.638)           | 0.557        | -                     | - |
| IL-6                        | 0.7(0.345-1.421)          | 0.324        | -                         | -            | 1.72(0.738-4.009)         | 0.209        | -                     | - |
| IL-10                       | 1.317(0.537-3.229)        | 0.548        | -                         | -            | 0.603(0.302-1.206)        | 0.153        | -                     | - |
| TNF- $\alpha$               | 1.5(0.614-3.668)          | 0.374        | -                         | -            | 1.378(0.695-2.732)        | 0.358        | -                     | - |
| IFN- $\gamma$               | 0.73(0.298-1.789)         | 0.492        | -                         | -            | 1.513(0.715-3.202)        | 0.279        | -                     | - |
| IL-17A                      | 1.342(0.685-2.628)        | 0.391        | -                         | -            | <b>1.856(0.928-3.709)</b> | <b>0.080</b> | -                     | - |
| TLC                         | <b>7.71(2.389-24.883)</b> | <b>0.001</b> | 2.626(0.595-11.586)       | 0.202        | 0.596(0.241-1.474)        | 0.262        | -                     | - |
| NLR                         | 1.458(0.641-3.315)        | 0.368        | -                         | -            | 1.805(0.791-4.122)        | 0.161        | -                     | - |
| PLR                         | 1.003(0.409-2.462)        | 0.994        | -                         | -            | 1.661(0.581-4.746)        | 0.344        | -                     | - |
| LMR                         | 0.904(0.443-1.843)        | 0.781        | -                         | -            | 1.745(0.878-3.47)         | 0.112        | -                     | - |
| gender                      | 1.204(0.46-3.154)         | 0.705        | -                         | -            | 1.209(0.463-3.161)        | 0.698        | -                     | - |
| age                         | 0.731(0.372-1.439)        | 0.365        | -                         | -            | 1.074(0.549-2.101)        | 0.836        | -                     | - |
| ECOG, (>2)                  | 1.638(0.701-3.831)        | 0.255        | -                         | -            | 1.867(0.786-4.435)        | 0.157        | -                     | - |
| TNM stage, (III-IV)         | 1.047(0.528-2.077)        | 0.895        | -                         | -            | 0.86(0.436-1.694)         | 0.662        | -                     | - |
| surgery history             | <b>0.111(0.036-0.34)</b>  | <b>0.000</b> | <b>0.206(0.047-0.903)</b> | <b>0.036</b> | 0.493(0.209-1.161)        | 0.106        | -                     | - |
| other chronic basic disease | 1.155(0.54-2.47)          | 0.711        | -                         | -            | 0.771(0.367-1.623)        | 0.494        | -                     | - |
| smoked                      | <b>1.992(0.96-4.134)</b>  | <b>0.064</b> | 1.146(0.456-2.876)        | 0.772        | 1.614(0.787-3.307)        | 0.191        | -                     | - |
| family cancer history       | 0.767(0.332-1.77)         | 0.534        | -                         | -            | 0.761(0.323-1.791)        | 0.532        | -                     | - |

Cohort 2 blood parameters after 2 cycles of treatment were grouped by cut-off value.
